# Supplementary material
Source: PubMed Central journal article supplement (PMC3356678)
Supplement: 1111135109_pnas.201111135SI.pdf [file 1111135109_pnas.201111135SI.pdf]

# Supporting Information

Sakuma et al. 10.1073/pnas.1111135109

## SI Materials and Methods

**Antibodies and Reagents.** Monoclonal antibodies against sLe<sup>x</sup> (clone SNH-3, murine IgM), sLe<sup>a</sup> (clone 2D3, murine IgM), and Le<sup>y</sup> (clone AH-6, murine IgM) were prepared as described previously (1–3). Anti-Le<sup>p</sup> antibody (clone 2-25LE, murine IgG1) was obtained from Seikagaku Biobusiness. Recombinant human E/P-selectins Fc chimera and FITC-conjugated antihuman IgG Fc antibody were obtained from R&D Systems and Sigma, respectively. Antibodies against c-Myc (clone 9E11) and SNAIL1, those against CDX2 and ZEB1, and those against phospho-c-Myc<sup>Ser62/Thr58</sup> and phospho-GSK3 $\beta$ <sup>Ser9</sup> (clone D85E12) were obtained from Abcam, Santa Cruz, and Cell Signaling Technology, respectively.

**Flow Cytometry.** For flow cytometric analyses, cells were harvested and stained with respective primary antibodies using culture supernatants at a dilution of 1:5 or purified antibodies at 1  $\mu$ g/mL. The cells were then stained with a 1:300 dilution of FITC-conjugated secondary antibody. For selectin-binding assays, cells were incubated with recombinant selectins at 20  $\mu$ g/mL followed by incubation with FITC-conjugated secondary antibody at 2  $\mu$ g/mL, with all of the reactions performed in calcium containing Dulbecco's PBS except experiments in the presence of EDTA at a final concentration of 1 mM. For blocking experiments, cells were pretreated with SNH-3 and/or 2D3 antibodies at a final concentration of 100  $\mu$ g/mL before incubation with recombinant selectins. Propidium iodide was used at 1  $\mu$ g/mL to identify living cells. Cells were analyzed with a FACSCalibur (BD Biosciences).

**Conventional and Quantitative RT-PCR Analysis.** Total cellular RNA was isolated with ISOGEN reagent (Nippon Gene). First strand cDNA was prepared from the total RNA (5  $\mu$ g) with SuperScript II Reverse Transcriptase (Invitrogen). Conventional RT-PCR analysis was performed with KOD-Plus (Toyobo) and primers listed in Table S1 using a GeneAmp PCR system 9700 (Applied Biosystems). For quantitative RT-PCR, cDNA samples were mixed with FAM-labeled TaqMan gene expression assays (Table S2), VIC-labeled TaqMan MGB probe for  $\beta$ -actin, and TaqMan gene expression master mix (Applied Biosystems), followed by amplification using 7500 Fast Real-Time PCR system (Applied Biosystems) according to the manufacturer's protocol. Results were calculated by the comparative CT method, with relative transcript levels determined as  $2^{-\Delta\Delta CT}$ .

**ChIP Assay.** Chromatin samples were isolated from cells with a ChIP-IT Express kit (Active Motif) according to the manufacturer's protocol. Samples (60  $\mu$ L) were incubated with antibodies (1  $\mu$ g) for 8 h at 4  $^{\circ}$ C. The primers for detection of the promoter sequences were designed in the 5'-regulatory regions of *ST3GAL1/3/4*, *FUT3*, and *FUT2*, all of which were previously reported (4–9). The primers used are listed in Table S3.

**RNA Knockdown and Forced Expression.** The pLKO.1-based lentiviral shRNA, the nontarget shRNA, packaging and envelope

plasmids were obtained from Sigma. The plasmids were co-transfected into HEK293T cells to produce viral particles using FuGENE 6 (Promega). HT29 and DLD-1 cells were infected with the viral supernatants in the presence of 8  $\mu$ g/mL of polybrene (Sigma). After selection with 5  $\mu$ g/mL of puromycin (Sigma), total RNA was extracted and analyzed by quantitative RT-PCR. For c-Myc knockdown, TRCN0000010389 having the sequence CCGGAACATGACCTCGACTACGACTCGAGTCGTAGT-CGAGGTCATAGTTCTTTTGG gave the best results among the five tested shRNA vectors. For CDX2 knockdown, TRCN0000013687 having the sequence CCGGAGCCCTTGAGTCCGGTGTCTTCTCGAGAAGACACCGGACTCAAGG-GCTTTTTT gave the best results among the five tested shRNA vectors. For CDX2 forced expression, a cDNA expression vector was purchased from OriGene and introduced into HT29 and DLD-1 cells using FuGENE 6 reagent. After a 3-d culture, total RNA was extracted and analyzed by quantitative RT-PCR.

**Cell Migration Assay.** Cell migration activity was determined using Biocoat Matrigel invasion chambers (BD Biosciences) according to the manufacturer's instructions. Briefly, cells ( $2 \times 10^5$ ) were seeded in serum-free culture medium onto the Matrigel-coated filters. Culture medium supplemented with 10% (vol/vol) FBS was added to the lower part of the chambers. After a 24-h incubation period at 37  $^{\circ}$ C, the filters were stained with Diff-Quik dye (Sysmex International Reagents) and migrated cells were counted in five randomly chosen fields under a light microscope.

**ELISA.** Culture supernatant VEGF levels were measured by ELISA using a Milliplex MAP Human Cytokine/Chemokine kit (Millipore). Samples were collected on the third day from the medium replacement and subjected to ELISA at a dilution of 1:4. All of the assays were performed in triplicate.

**Western Blotting.** Cell lysates were prepared with RIPA buffer (Thermo Scientific) containing blends of protease and phosphatase inhibitors (Roche Applied Science). Samples were subjected to SDS/PAGE, followed by transfer onto PVDF membrane (Bio-Rad). After blocking, the blots were incubated with primary antibodies and HRP-conjugated secondary antibody (SouthernBiotech) at appropriate dilutions. The signal was detected with an ECL kit (GE Healthcare).

**Immunohistochemistry.** Colon cancer tissues were obtained from patients in Kyoto University Hospital under informed consent, and investigations were conducted according to the Declaration of Helsinki principles. Frozen sections of 10- $\mu$ m thickness were fixed with ice-cold acetone. After blocking with PBS(-) including 5% (vol/vol) normal goat serum and 0.3% Triton X-100 for 60 min, the sections were incubated with primary and secondary antibodies, and Hoechst 33342 (Dojindo) according to the manufacturer's instructions. Stained sections were observed with a LSM510 confocal microscope (Carl Zeiss).

1. Abe K, McKibbin JM, Hakomori S (1983) The monoclonal antibody directed to difucosylated type 2 chain (Fuc alpha 1 leads to 2Gal beta 1 leads to 4[Fuc alpha 1 leads to 3]GlcNAc; Y Determinant). *J Biol Chem* 258:11793–11797.
2. Phillips ML, et al. (1990) ELAM-1 mediates cell adhesion by recognition of a carbohydrate ligand, sialyl-Lex. *Science* 250:1130–1132.

3. Takada A, et al. (1991) Adhesion of human cancer cells to vascular endothelium mediated by a carbohydrate antigen, sialyl Lewis X. *Biochem Biophys Res Commun* 179:713–719.
4. Taniguchi A, Yoshikawa I, Matsumoto K (2001) Genomic structure and transcriptional regulation of human Galbeta1,3GalNAc alpha2,3-sialyltransferase (hST3Gal I) gene. *Glycobiology* 11:241–247.

5. Taniguchi A, Saito K, Kubota T, Matsumoto K (2003) Characterization of the promoter region of the human Galbeta1,3(4)GlcNAc alpha2,3-sialyltransferase III (hST3Gal III) gene. *Biochim Biophys Acta* 1626:92-96.
6. Taniguchi A, Matsumoto K (1999) Epithelial-cell-specific transcriptional regulation of human Galbeta1,3GalNAc/Galbeta1,4GlcNAc alpha2,3-sialyltransferase (hST3Gal IV) gene. *Biochem Biophys Res Commun* 257:516-522.
7. Cameron HS, Szczepaniak D, Weston BW (1995) Expression of human chromosome 19p alpha(1,3)-fucosyltransferase genes in normal tissues. Alternative splicing, polyadenylation, and isoforms. *J Biol Chem* 270:20112-20122.
8. Dabrowska A, Baczyńska D, Widerak K, Laskowska A, Ugorski M (2005) Promoter analysis of the human alpha1,3/4-fucosyltransferase gene (FUT III). *Biochim Biophys Acta* 1731:66-73.
9. Koda Y, Soejima M, Wang B, Kimura H (1997) Structure and expression of the gene encoding secretor-type galactoside 2-alpha-L-fucosyltransferase (FUT2). *Eur J Biochem* 246:750-755.

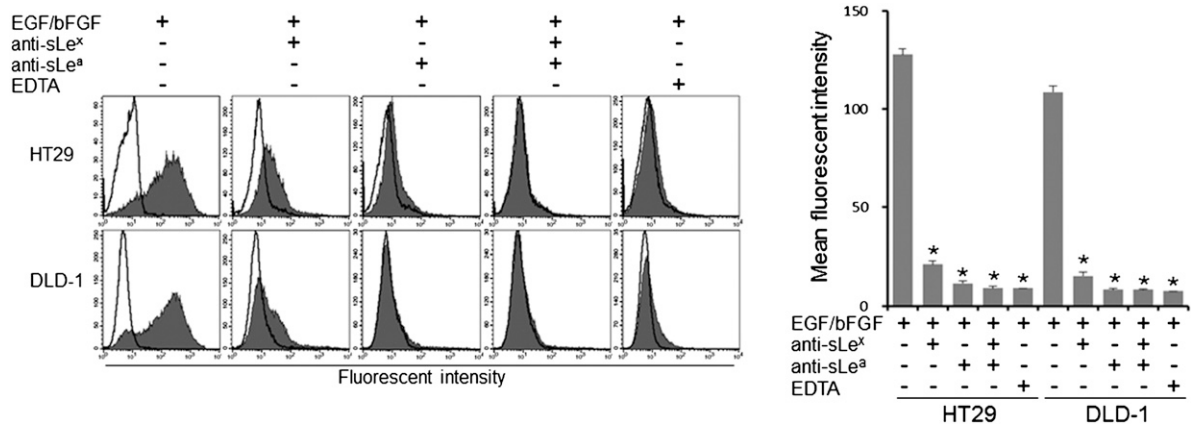

**Fig. S1.** Contribution of sLe<sup>x/a</sup> to E-selectin binding activity. E-selectin binding activity was examined by flow cytometry using recombinant E-selectin. The EGF/bFGF-treated cells were pretreated with or without anti-sLe<sup>x</sup> and/or anti-sLe<sup>a</sup> antibodies at a final concentration of 100 μg/mL or pretreated with or without 1 mM EDTA before incubation with recombinant E-selectin. Recombinant P-selectin was used as a negative control. Statistic analysis was performed in three independent experiments by *t* test. Bold lines, staining control; error bars, SD; asterisks, *P* < 0.000005 compared with the cells without pretreatment.

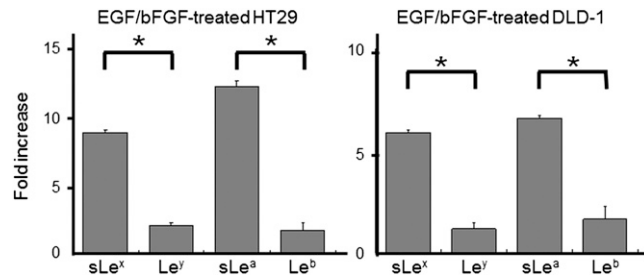

**Fig. S2.** Contribution of *FUT2* down-regulation to the preferential increase of sLe<sup>x/a</sup> compared with Le<sup>y/b</sup>. Expression levels of sLe<sup>x</sup>, Le<sup>y</sup>, sLe<sup>a</sup>, and Le<sup>b</sup> were determined by flow cytometry. Results from three independent experiments are shown by fold increases of the mean fluorescent intensity in the EGF/bFGF-treated cells compared with that in the untreated cells. Statistic analysis was performed in three independent experiments by *t* test. Error bars, SD; asterisks, *P* < 0.01.

- A** ST3GAL1  
 TTCCTTAGCCCCGCCAGCTTGAGGGCCG  
 CGTCCAGAGAGCGGGGAGCTCCTCTCGG  
 GCGCCGATCAGGTCCCCGCGCCGACG  
 CGCCGCTCCGGCTCTCCAGGCTGG  
 CCTCTGCCAGCCGCTGCGGTCCACGT  
 GGCTTGGCAGAGCTAAATTCGGCTTCAG  
 GAAGCCCGGAGCCAGGGAAAGCCGAG  
 CCAAGTTGGGGT
- B** ST3GAL3  
 AGTGGCCGTGACTACCCTAGCACTTTGC  
 GTTCCCGCGCGGGGACGAAACACGCT  
 CTCGAGGGGAGAGAGCCGTGCGTCTCT  
 GGGCCGTGAAGCCAGGGGAAGAGGTTT  
 CTCTAGACAGCTCGATGTGCCCGGAGA  
 GACACCCACGCTGAACCTGCAAGCTGGG  
 GTGCTCCACCAGCGCAACCTCTCGCCC  
 CGCACTCGCCGACGCACTGCTCGTGG  
 TAGGCGGGGTGGCCGGGACGGCAAATCC  
 GCGGCTCCTGCGTCTA
- C** ST3GAL4  
 GGCTCACCTGGATCCTTAATGCCGCCCT  
 TGGAGGAGTTAGGAGGATCCTGGATGAG  
 AAAACTCACCTCAGGATGATTGCCCCA  
 GGGAGCAGCTTCTGCTTTCTGGTGAAG  
 GGAGGGGAGACAGTGGGTGTCTCTGC  
 TCCAGTGTCTAGGCAGGAGATTTGTGAA  
 GCTGACCGGACACCTGTG
- D** FUT3  
 GGTCTCACAGGCGAGATTAGGACACCCC  
 GGAAACTGGCTTCCAGACAATATCCCTGC  
 TGCAGGGGAGAACCCCTAGGTACCTG  
 GTGACAGGTGTGTGCTGCAATGTACAGT  
 ACTTGTTC
- E** FUT2  
 CTTTCTGTTGGGGATCACAAACAGTTCCC  
 CAAGGAAGACCCCTCGGGGACCCGGATGG  
 GGGATGCGACCTTGTCTCTGCTCTCTCCC  
 CCACCCTTATGGCCAGGCTTGGGGTGCCT  
 GGTGCAGGTGGAGGAGCTAAGGGTAGAT  
 AACAAAGATGGACTTTGTGGCCG

**Fig. 53.** 5'-regulatory regions of *ST3GAL1/3/4*, *FUT3*, and *FUT2*. (A–E) DNA sequences of the 5'-regulatory regions of *ST3GAL1/3/4*, *FUT3*, and *FUT2* are shown. Bold letters, primer-targeted sequences for ChIP assay; single underlines, potential c-Myc binding sites; double underlines, potential binding sites for CDX1 and CDX2.

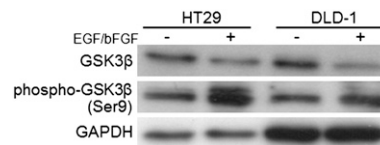

**Fig. 54.** EGF/bFGF-induced alteration in the levels of GSK3 $\beta$  and phospho-GSK3 $\beta$ <sup>Ser9</sup>. The levels of GSK3 $\beta$  and phospho-GSK3 $\beta$ <sup>Ser9</sup> in the untreated and EGF/bFGF-treated cells were determined by Western blotting.

**Table S1. Primers used for conventional RT-PCR**

| Gene              | Primer sequence                                                   | Length | Annealing, °C | Cycles |
|-------------------|-------------------------------------------------------------------|--------|---------------|--------|
| <i>β-actin</i>    | F: CGTGCCTGACATTAAGGAGAAGC<br>R: CAATGCCAGGGTACATGGTGGT           | 305    | 57            | 22     |
| <i>ST3GAL1</i>    | F: TGGTCTGGAGCTCCGAGAA<br>R: GACTGTCTATCTCAGGCCATAAGAAGA          | 363    | 58            | 30     |
| <i>ST3GAL2</i>    | F: GATGATGCTGCAGCCCCAGTTC<br>R: ACATCCTGCTCAAAGCCCACGGT           | 237    | 58            | 30     |
| <i>ST3GAL3</i>    | F: CGGATGGCTTCTGGAAATCTGT<br>R: TTGTGCGTCCAGGACTCTTTGA            | 300    | 55            | 30     |
| <i>ST3GAL4</i>    | F: TCCAGGGTGAGGCAGAGAGCAA<br>R: TTGGGGATGGAGGAGCTGGTGA            | 190    | 58            | 27     |
| <i>FUT1</i>       | F: CACGAAAAGCGGACTGTGGATCTG<br>R: GACACAGGATCGACAGGCCTAG          | 172    | 58            | 31     |
| <i>FUT2</i>       | F: CCTTCAGCAGGACCAGGTGAGA<br>R: GGTCCCAGTGCCTTTGATGTTGAG          | 198    | 58            | 31     |
| <i>FUT3</i>       | F: TGTTTCTTCTCCTACCTGCGTGTGC<br>R: GTGTCTGCCTGTGGGTACACCT         | 230    | 58            | 30     |
| <i>FUT4</i>       | F: CAACATGTGACCGTGGACGTGTTTC<br>R: GGTGATATAATCCAGGTGCTGCGAGTT    | 135    | 58            | 27     |
| <i>FUT6</i>       | F: CATCTCAAGGTGGACGTGTACGGA<br>R: GGTGGCAGGAACCTCTCGTAGT          | 215    | 58            | 30     |
| <i>FUT7</i>       | F: CCTGGGAGACTGTGGATGAATAATGCT<br>R: GTGCCAGACAAGGATGGTGATCGT     | 174    | 58            | 32     |
| <i>E-cadherin</i> | F: CAGAGCCTCTGGATAGAGAACGCA<br>R: GGCATTGTAGGTGTTACATCATCGTC      | 245    | 58            | 30     |
| <i>SNAIL1</i>     | F: TATGCTGCCTTCCCAGGCTTG<br>R: ATGTGCATCTTGAGGGCACCC              | 143    | 57            | 30     |
| <i>ZEB1</i>       | F: CCAGTGGTCATGATGAAAATGGAACACC<br>R: CAGACTGCGTCACATGTCTTTGATCTC | 243    | 58            | 33     |
| <i>Vimentin</i>   | F: GGCTCAGATTCAGGAACAGC<br>R: CTGAATCTCATCCTGCAGGC                | 373    | 55            | 30     |
| <i>MUC2</i>       | F: CCGTCTCTACCACATCAT<br>R: CTCTCCAGGCCGTTGAAGT                   | 149    | 55            | 30     |
| <i>ALPI</i>       | F: GCAACCCTGCAACCCACCCAAGGA<br>R: CCAGCATCCAGATGTCCCGGGAG         | 278    | 62            | 30     |
| <i>c-Myc</i>      | F: TCCGTCTCGGATTCTCTGCTCT<br>R: GCCTCCAGCAGAAGGTGATCCA            | 208    | 58            | 30     |
| <i>CDX1</i>       | F: AGGACAAGTACCGCGTGGTCTA<br>R: CCTCTGAACGTATGGAGGAGGA            | 670    | 57            | 35     |
| <i>CDX2</i>       | F: CAGTCGCTACATACCATCCG<br>R: GCAGAGTCCACGCTCCTCAT                | 384    | 57            | 28     |

F, forward primer; R, reverse primer.

**Table S2. TaqMan gene expression assays used for quantitative RT-PCR**

| Gene           | Assay ID      |
|----------------|---------------|
| <i>ST3GAL1</i> | Hs00161688_m1 |
| <i>ST3GAL3</i> | Hs00544033_m1 |
| <i>ST3GAL4</i> | Hs00920871_m1 |
| <i>FUT2</i>    | Hs00704693_s1 |
| <i>FUT3</i>    | Hs01868572_s1 |
| <i>FUT6</i>    | Hs03026676_s1 |
| <i>c-Myc</i>   | Hs00905030_m1 |
| <i>CDX2</i>    | Hs01078080_m1 |

**Table S3. Primers used for CHIP assay**

| Gene           | Primer sequence                                                   | Product length | Annealing, °C |
|----------------|-------------------------------------------------------------------|----------------|---------------|
| <i>ST3GAL1</i> | F: TTCCTTAGCCCCGCCAGCTTGA<br>R: CACCCCAACTTGGCTCGGCTTT            | 209            | 58            |
| <i>ST3GAL3</i> | F: AGTGGCCGTGACTACCCCTAGCAC<br>R: TAGACGCAGGAGCCCGGATT            | 268            | 62            |
| <i>ST3GAL4</i> | F: GGCTCACCTGGATCCTTAATGCC<br>R: CACAGGTGTCCGGTCAGCTTCA           | 189            | 58            |
| <i>FUT2</i>    | F: CTTTCTGTTGGGGCATCACAACAGTTC<br>R: CGGCCACAAAGTCCATCTTGTTATCTAC | 165            | 58            |
| <i>FUT3</i>    | F: GGTCTCACAGGCGAGATTAGGACA<br>R: GGAACAAGTACGTGTACATTGCAGCACA    | 123            | 58            |

F, forward primer; R, reverse primer.
